# Supplementary material for: EMT circulating tumor cells detected by cell-surface vimentin are associated with prostate cancer progression
Source: PubMed Central journal article supplement (PMC5564771; doi:10.18632/oncotarget.17632), 2017-05-04
Supplement: oncotarget-08-49329-s001.pdf [file oncotarget-08-49329-s001.pdf]

# EMT circulating tumor cells detected by cell-surface vimentin are associated with prostate cancer progression

## SUPPLEMENTARY MATERIALS

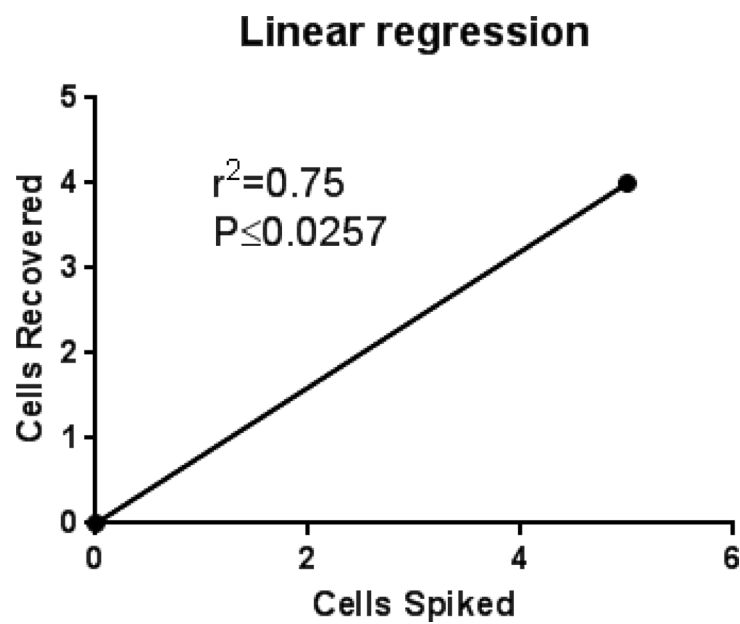

**Supplementary Figure 1: LNCaP cell spiking assay.** Linear regression plot of ~5 LNCaP cells spiked into healthy donor human blood and the rate of recovery.

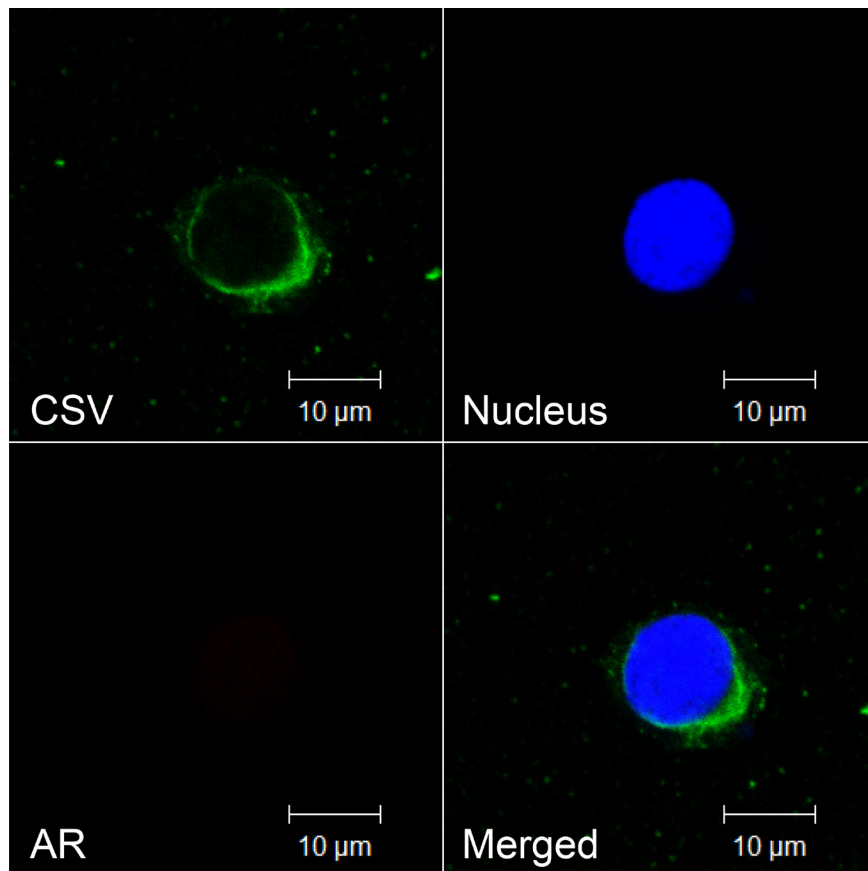

**Supplementary Figure 2: SHEP cell stained for CSV and AR.** Representative image of an SHEP cell stained with CSV and AR as indicated.

**Supplementary Table 1: Clinical parameters for all metastatic prostate cancer patients.** See Supplementary\_Table\_1.
